# Supplementary material for: Thermodynamic calculations of oxygen self-diffusion in mixed-oxide nuclear fuels
Source: Royal Society of Chemistry journal article supplement (doi:10.1039/c6ra14424a), 2016-01-01
Supplement: c6ra14424a2.pdf [file c6ra14424a2.pdf]

## Pu-U-ThO<sub>2</sub> Potential Files

Supplementary material describing the actinide potential for use in LAMMPS [29] is provided at

<http://abulafia.mt.ic.ac.uk/potentials/actinides>
